# Supplementary material
Source: PubMed Central journal article supplement (PMC7092737)
Supplement: ESO881017_Supplemental_Material.pdf [file ESO881017_Supplemental_Material.pdf]

# Supplementary materials

Temporal trends in the accuracy of hospital diagnostic coding for identifying acute stroke: a population-based study

**Web appendix 1** Distribution of management mode stratified by study period for all ascertained stroke cases and incident stroke cases

**Web appendix 2** Reasons for “false negative” cases in hospitalised stroke cases stratified by study period and initial reasons for admission

**Web appendix 3** Reasons and temporal trends for wrong subtyping among otherwise correctly identified hospitalised incident strokes

**Web appendix 4** Temporal trends and impact of using hospital discharge codes in identifying incident stroke ascertained in OXVASC with stratification by study period and patient age groups

**Web appendix 5** Reasons for “false positive” cases stratified by time period and searching strategy

**Web appendix 6** Age-specific time trends of the accuracy of hospital discharge codes in identifying true acute stroke cases (positive predictive value) stratified by searching strategies

**Web appendix 1 Distribution of management mode stratified by study period for all ascertained stroke cases and incident stroke cases**

|                                                                   | <b>2002-2005</b> | <b>2005-2008</b> | <b>2008-2011</b> | <b>2011-2014</b> | <b>2014-2017</b> | <b>P<sub>heterogeneity</sub></b> | <b>Total</b>    |
|-------------------------------------------------------------------|------------------|------------------|------------------|------------------|------------------|----------------------------------|-----------------|
| <b>All ascertained stroke cases</b>                               | <b>(n=612)</b>   | <b>(n=577)</b>   | <b>(n=614)</b>   | <b>(n=603)</b>   | <b>(n=605)</b>   | <b>0.10</b>                      | <b>(n=3011)</b> |
| Patients seen in outpatient clinic or managed in community        | 240 (39.2)       | 207 (35.9)       | 196 (31.9)       | 198 (32.8)       | 204 (33.7)       |                                  | 1044 (34.7)     |
| Strokes that happened out of the area or abroad                   | 13 (2.1)         | 12 (2.1)         | 16 (2.6)         | 25 (4.1)         | 17 (2.8)         |                                  | 84 (2.8)        |
| Strokes that happened during hospital admission for other disease | 56 (9.2)         | 43 (7.5)         | 53 (8.6)         | 42 (7.0)         | 42 (6.9)         |                                  | 236 (7.8)       |
| Patients admitted to hospital for acute stroke                    | 303 (49.5)       | 315 (54.6)       | 349 (56.8)       | 338 (56.1)       | 342 (56.5)       |                                  | 1647 (54.7)     |
| <b>Incident stroke cases</b>                                      | <b>(n=430)</b>   | <b>(n=428)</b>   | <b>(n=463)</b>   | <b>(n=471)</b>   | <b>(n=462)</b>   | <b>0.46</b>                      | <b>(n=2254)</b> |
| Patients seen in outpatient clinic or managed in community        | 166 (38.6)       | 141 (32.9)       | 152 (32.8)       | 151 (32.1)       | 149 (32.3)       |                                  | 759 (33.7)      |
| Strokes that happened out of the area or abroad                   | 11 (2.6)         | 11 (2.6)         | 13 (2.8)         | 23 (4.9)         | 16 (3.5)         |                                  | 74 (3.3)        |
| Strokes that happened during hospital admission for other disease | 30 (7.0)         | 32 (7.5)         | 30 (6.5)         | 29 (6.2)         | 32 (6.9)         |                                  | 153 (6.8)       |
| Patients admitted to hospital for the acute stroke                | 223 (51.9)       | 244 (57.0)       | 268 (57.9)       | 268 (56.9)       | 265 (57.4)       |                                  | 1268 (56.3)     |

Numbers are presented as n (%).

**Web appendix 2 Reasons for “false negative” cases in hospitalised stroke cases stratified by study period and initial reasons for admission**

|                                                      | 2002-2005     | 2005-2008     | 2008-2011     | 2011-2014     | 2014-2017     | P <sub>heterogeneity</sub> | Total          |
|------------------------------------------------------|---------------|---------------|---------------|---------------|---------------|----------------------------|----------------|
| <b>All hospitalised stroke cases:</b>                |               |               |               |               |               |                            |                |
| <b>Initial reason as “suspected acute stroke”</b>    | <b>(n=72)</b> | <b>(n=98)</b> | <b>(n=96)</b> | <b>(n=72)</b> | <b>(n=62)</b> | <b>&lt;0.0001</b>          | <b>(n=400)</b> |
| Complete omission*                                   | 45 (62.5)     | 62 (63.3)     | 60 (62.5)     | 45 (62.5)     | 23 (37.1)     |                            | 235 (58.8)     |
| Identified by coding but not from primary diagnosis  | 3 (4.2)       | 2 (2.0)       | 4 (4.2)       | 4 (5.6)       | 13 (21.0)     |                            | 26 (6.5)       |
| Inaccurately coded as transient ischaemic attack     | 16 (22.2)     | 13 (13.3)     | 22 (22.9)     | 14 (19.4)     | 8 (12.9)      |                            | 73 (18.3)      |
| Inaccurately coded with other relevant diagnosis‡    | 8 (11.1)      | 21 (21.4)     | 10 (10.4)     | 9 (12.5)      | 18 (29.0)     |                            | 66 (16.5)      |
| <b>Initial reason as other non-stroke diagnosis‡</b> | <b>(n=31)</b> | <b>(n=28)</b> | <b>(n=28)</b> | <b>(n=30)</b> | <b>(n=25)</b> | <b>0.0003</b>              | <b>(n=142)</b> |
| Complete omission*                                   | 15 (48.4)     | 15 (53.6)     | 14 (50.0)     | 2 (6.7)       | 6 (24.0)      |                            | 52 (36.6)      |
| Identified by coding but not from primary diagnosis  | 15 (48.4)     | 8 (28.6)      | 5 (17.9)      | 16 (53.3)     | 10 (40.0)     |                            | 54 (38.0)      |
| Inaccurately coded as transient ischaemic attack     | 0 (0)         | 2 (7.1)       | 2 (7.1)       | 0 (0)         | 1 (4.0)       |                            | 5 (3.5)        |
| Inaccurately coded with other diagnosis‡             | 1 (3.2)       | 3 (10.7)      | 7 (25.0)      | 12 (40.0)     | 8 (32.0)      |                            | 31 (21.8)      |
| <b>Hospitalised incident stroke cases:</b>           |               |               |               |               |               |                            |                |
| <b>Initial reason as “suspected acute stroke”</b>    | <b>(n=54)</b> | <b>(n=81)</b> | <b>(n=74)</b> | <b>(n=53)</b> | <b>(n=49)</b> | <b>0.0004</b>              | <b>(n=311)</b> |
| Complete omission*                                   | 32 (59.3)     | 49 (60.5)     | 42 (56.6)     | 27 (50.9)     | 15 (30.6)     |                            | 165 (53.1)     |
| Identified by coding but not from primary diagnosis  | 2 (3.7)       | 2 (2.5)       | 4 (5.4)       | 3 (5.7)       | 10 (20.4)     |                            | 21 (6.8)       |
| Inaccurately coded as transient ischaemic attack     | 12 (22.2)     | 10 (12.3)     | 18 (24.3)     | 13 (24.5)     | 7 (14.3)      |                            | 60 (19.3)      |
| Inaccurately coded with other relevant diagnosis‡    | 8 (14.8)      | 20 (24.7)     | 10 (13.5)     | 10 (18.9)     | 17 (34.7)     |                            | 65 (20.9)      |
| <b>Initial reason as other non-stroke diagnosis‡</b> | <b>(n=20)</b> | <b>(n=21)</b> | <b>(n=20)</b> | <b>(n=21)</b> | <b>(n=17)</b> | <b>0.002</b>               | <b>(n=99)</b>  |
| Complete omission*                                   | 9 (45.0)      | 9 (42.9)      | 9 (45.0)      | 0 (0)         | 3 (17.6)      |                            | 30 (30.3)      |
| Identified by coding but not from primary diagnosis  | 11 (55.0)     | 8 (38.1)      | 3 (15.0)      | 13 (61.9)     | 8 (47.1)      |                            | 43 (43.4)      |
| Inaccurately coded as transient ischaemic attack     | 0 (0)         | 2 (9.5)       | 2 (10.0)      | 0 (0)         | 1 (5.9)       |                            | 5 (5.1)        |
| Inaccurately coded with other diagnosis‡             | 0 (0)         | 2 (9.5)       | 6 (30.0)      | 8 (38.1)      | 5 (29.4)      |                            | 21 (21.2)      |

Numbers are presented as n(%).

\*true acute stroke admissions to the hospitals that were not matched to any administrative data records obtained from the same hospitals or were only matched to non-relevant diagnosis.

‡ acute stroke that happened during admission for other diseases.

†e.g. subdural haemorrhage, occlusion of cerebral artery, cerebral aneurysm without rupture, headache, dementia, collapse, brain injury, dysphagia.

**Web appendix 3 Reasons and temporal trends for wrong subtyping among otherwise correctly identified hospitalised incident strokes**

|                        | <b>2002-2005</b> | <b>2005-2008</b> | <b>2008-2011</b> | <b>2011-2014</b> | <b>2014-2017</b> | <b>Total</b> |
|------------------------|------------------|------------------|------------------|------------------|------------------|--------------|
| IS coded as ICH or SAH | 6                | 3                | 3                | 1                | 1                | 14           |
| ICH coded as I63       | 0                | 1                | 0                | 0                | 1                | 2            |
| ICH coded as I64       | 9                | 6                | 1                | 0                | 0                | 16           |
| ICH coded as SAH       | 1                | 2                | 2                | 2                | 4                | 11           |
| SAH coded as ICH       | 0                | 2                | 0                | 1                | 0                | 3            |
| <b>Total</b>           | <b>16</b>        | <b>14</b>        | <b>6</b>         | <b>4</b>         | <b>6</b>         | <b>46</b>    |

IS=ischaemic stroke; ICH=intracerebral haemorrhage; SAH=subarachnoid haemorrhage.

**Web appendix 4 Temporal trends and impact of using hospital discharge codes in identifying incident stroke ascertained in OXVASC with stratification by study period and patient age groups**

|                                                      | 2002-2005      | 2005-2008      | 2008-2011      | 2011-2014      | 2014-2017      | p <sub>trend</sub> | Total           | p*    |
|------------------------------------------------------|----------------|----------------|----------------|----------------|----------------|--------------------|-----------------|-------|
| <b>All incident stroke cases</b>                     |                |                |                |                |                |                    |                 |       |
| <65y                                                 | 38/87 (43.7)   | 25/86 (29.1)   | 46/114 (40.2)  | 58/119 (48.7)  | 47/121 (38.8)  | 0.52               | 214/527 (40.6)  | 0.001 |
| 65-74y                                               | 37/117 (31.6)  | 37/85 (43.5)   | 41/88 (46.6)   | 60/114 (52.6)  | 34/80 (42.5)   | 0.02               | 209/484 (43.2)  |       |
| ≥75y                                                 | 107/226 (47.3) | 114/257 (44.4) | 120/261 (46.0) | 113/238 (47.5) | 152/261 (58.5) | 0.009              | 606/1243 (48.8) |       |
| <b>Incident stroke cases that were hospitalised†</b> |                |                |                |                |                |                    |                 |       |
| <65y                                                 | 37/49 (75.5)   | 25/44 (56.8)   | 44/65 (67.7)   | 55/71 (77.5)   | 46/60 (76.7)   | 0.22               | 207/289 (71.6)  | 0.98  |
| 65-74y                                               | 36/56 (64.3)   | 37/55 (67.3)   | 41/56 (73.2)   | 58/74 (78.4)   | 34/53 (64.2)   | 0.47               | 206/294 (70.1)  |       |
| ≥75y                                                 | 106/148 (71.6) | 112/177 (63.3) | 119/177 (67.2) | 110/152 (72.4) | 151/184 (82.1) | 0.003              | 598/838 (71.4)  |       |

Numbers are presented as n (%).

\*p values indicate the trend of sensitivity with increasing age.

†including cases that were admitted for suspected stroke or cases where stroke happened during admission for other diseases.

Web appendix 5 Reasons for “false positive” cases stratified by time period and searching strategy

|                                                             | Total          | 2002-2005       | 2005-2008      | 2008-2011      | 2011-2014      | 2014-2017      | P <sub>het</sub>  |
|-------------------------------------------------------------|----------------|-----------------|----------------|----------------|----------------|----------------|-------------------|
| <b>Full codes and all admissions</b>                        | <b>(n=608)</b> | <b>(n=139)*</b> | <b>(n=135)</b> | <b>(n=112)</b> | <b>(n=112)</b> | <b>(n=110)</b> | <b>&lt;0.0001</b> |
| Cancelled or duplicated admission                           | 19 (3.1)       | 7 (5.0)         | 1 (0.7)        | 2 (1.8)        | 8 (7.1)        | 1 (0.9)        |                   |
| Elective admission for investigation/procedure after stroke | 228 (37.5)     | 27 (19.4)       | 53 (39.3)      | 60 (53.6)      | 46 (41.1)      | 42 (38.2)      |                   |
| Admission for rehabilitation after stroke                   | 59 (9.7)       | 39 (28.1)       | 11 (8.1)       | 1 (0.9)        | 2 (1.8)        | 6 (5.5)        |                   |
| Admission for medical complication after stroke             | 30 (4.9)       | 11 (7.9)        | 7 (5.2)        | 1 (0.9)        | 5 (4.5)        | 6 (5.5)        |                   |
| Non-stroke diagnosis                                        | 249 (41.0)     | 49 (35.3)       | 60 (44.0)      | 45 (40.2)      | 46 (41.1)      | 49 (44.0)      |                   |
| TIA                                                         | 56 (9.2)       | 7 (5.0)         | 12 (8.9)       | 16 (14.3)      | 13 (11.6)      | 8 (7.3)        |                   |
| Old stroke or small vessel disease on imaging               | 24 (3.8)       | 3 (2.2)         | 11 (8.1)       | 0 (0)          | 3 (2.7)        | 7 (6.4)        |                   |
| Seizure                                                     | 16 (2.6)       | 5 (3.6)         | 2 (1.5)        | 4 (3.6)        | 3 (2.7)        | 2 (1.8)        |                   |
| MS, vasculitis or other CNS inflammatory disease            | 6 (1.0)        | 2 (1.4)         | 0 (0)          | 1 (0.9)        | 1 (0.9)        | 2 (1.8)        |                   |
| CNS tumour or metastatic disease                            | 12 (2.0)       | 2 (1.4)         | 5 (3.7)        | 1 (0.9)        | 3 (2.7)        | 1 (0.9)        |                   |
| Dementia or other neurodegenerative disease                 | 6 (1.0)        | 4 (2.9)         | 1 (0.7)        | 0 (0)          | 1 (0.9)        | 0 (0)          |                   |
| Trauma, SDH, EDH or unruptured aneurysm                     | 82 (13.5)      | 13 (9.4)        | 16 (11.9)      | 17 (15.2)      | 17 (15.2)      | 19 (17.3)      |                   |
| Other†                                                      | 47 (7.7)       | 13 (9.4)        | 13 (9.6)       | 6 (5.4)        | 5 (4.5)        | 10 (9.1)       |                   |
| Wrong GP                                                    | 23 (3.8)       | 6 (4.3)         | 3 (2.2)        | 3 (2.7)        | 5 (4.5)        | 6 (5.5)        |                   |
| <b>Stroke-specific codes and first admission only</b>       | <b>(n=152)</b> | <b>(n=37)*</b>  | <b>(n=41)</b>  | <b>(n=23)</b>  | <b>(n=23)</b>  | <b>(n=28)</b>  | <b>0.24</b>       |
| Cancelled or duplicated admission                           | 0 (0)          | 0 (0)           | 0 (0)          | 0 (0)          | 0 (0)          | 0 (0)          |                   |
| Elective admission for investigation/procedure after stroke | 9 (5.9)        | 1 (2.7)         | 6 (14.6)       | 1 (4.3)        | 1 (4.3)        | 0 (0)          |                   |
| Admission for rehabilitation after stroke                   | 3 (2.0)        | 1 (2.7)         | 1 (2.4)        | 1 (4.3)        | 0 (0)          | 0 (0)          |                   |
| Admission for medical complication after stroke             | 6 (3.9)        | 2 (5.4)         | 4 (9.8)        | 0 (0)          | 0 (0)          | 0 (0)          |                   |
| Non-stroke diagnosis                                        | 113 (74.3)     | 28 (75.7)       | 27 (65.9)      | 18 (78.3)      | 17 (73.9)      | 23 (82.1)      |                   |
| TIA                                                         | 36 (23.7)      | 6 (16.2)        | 8 (19.5)       | 8 (34.8)       | 8 (34.8)       | 6 (21.4)       |                   |
| Old stroke or small vessel disease on imaging               | 12 (7.9)       | 2 (5.4)         | 9 (22.0)       | 0 (0)          | 0 (0)          | 1 (3.6)        |                   |
| Seizure                                                     | 13 (8.6)       | 5 (13.5)        | 2 (4.9)        | 3 (13.0)       | 2 (8.7)        | 1 (3.6)        |                   |
| MS, vasculitis or other CNS inflammatory disease            | 3 (2.0)        | 2 (5.4)         | 0 (0)          | 0 (0)          | 0 (0)          | 1 (3.6)        |                   |
| CNS tumour or metastatic disease                            | 9 (5.9)        | 2 (5.4)         | 2 (4.9)        | 1 (4.3)        | 3 (13.0)       | 1 (3.6)        |                   |
| Dementia or other neurodegenerative disease                 | 3 (2.0)        | 2 (5.4)         | 1 (2.4)        | 0 (0)          | 0 (0)          | 0 (0)          |                   |
| Trauma, SDH, EDH or unruptured aneurysm                     | 10 (6.6)       | 0 (0)           | 1 (2.4)        | 3 (13.0)       | 2 (8.7)        | 4 (14.3)       |                   |
| Other†                                                      | 27 (17.8)      | 9 (24.3)        | 4 (9.8)        | 3 (13.0)       | 2 (8.7)        | 9 (32.1)       |                   |
| Wrong GP                                                    | 21 (13.8)      | 5 (13.5)        | 3 (7.3)        | 3 (13.0)       | 5 (21.7)       | 5 (17.9)       |                   |

Numbers are presented as n (%).

\*n=6 cases with unknown reasons excluded. †including headache, sepsis, acute peripheral vascular disease and myocardial infarction.

**Web appendix 6 Age-specific time trends of the accuracy of hospital discharge codes in identifying true acute stroke cases (positive predictive value) stratified by searching strategies**

|                                                    | 2002-2005        | 2005-2008        | 2008-2011        | 2011-2014        | 2014-2017        | P <sub>trend</sub> |
|----------------------------------------------------|------------------|------------------|------------------|------------------|------------------|--------------------|
| <b>Full non-specific codes (I60-I68):</b>          |                  |                  |                  |                  |                  |                    |
| <b>All admissions</b>                              |                  |                  |                  |                  |                  |                    |
| <65y                                               | 63.5 (52.0-73.7) | 50.0 (39.6-60.4) | 59.4 (49.6-68.5) | 62.7 (53.0-71.6) | 57.0 (47.1-66.3) | 0.93               |
| 65-74y                                             | 57.1 (46.8-66.9) | 59.5 (47.9-70.0) | 65.8 (54.7-75.4) | 73.5 (63.8-81.3) | 60.5 (49.2-70.9) | 0.16               |
| ≥75y                                               | 64.9 (58.4-70.9) | 71.8 (65.5-77.4) | 79.4 (73.5-84.3) | 78.0 (72.0-83.0) | 84.4 (79.2-88.5) | <0.0001            |
| <b>Excluding re-admission ≤ 28 days</b>            |                  |                  |                  |                  |                  |                    |
| <65y                                               | 73.4 (61.3-82.8) | 52.5 (41.6-63.2) | 62.8 (52.6-71.9) | 65.3 (55.4-74.1) | 62.6 (52.3-72.0) | 0.80               |
| 65-74y                                             | 76.5 (64.9-85.1) | 65.2 (52.9-75.7) | 67.1 (55.8-76.7) | 74.5 (64.7-82.2) | 69.7 (57.6-79.6) | 0.87               |
| ≥75y                                               | 76.3 (69.7-81.8) | 76.1 (69.8-81.4) | 79.6 (73.6-84.5) | 79.0 (73.0-84.0) | 85.0 (79.8-89.1) | 0.02               |
| <b>First admission only</b>                        |                  |                  |                  |                  |                  |                    |
| <65y                                               | 78.3 (66.1-87.0) | 57.4 (45.4-68.5) | 70.5 (59.5-79.6) | 71.9 (61.7-80.3) | 69.2 (58.1-78.5) | 0.96               |
| 65-74y                                             | 76.9 (65.1-85.6) | 67.2 (54.8-77.6) | 68.7 (56.6-78.6) | 79.7 (69.4-87.2) | 75.0 (62.0-84.6) | 0.57               |
| ≥75y                                               | 76.0 (69.2-81.6) | 76.8 (70.3-82.2) | 79.4 (73.8-85.2) | 80.1 (73.8-85.2) | 86.2 (80.7-90.3) | 0.01               |
| <b>Stroke-specific codes (I60, I61, I63, I64):</b> |                  |                  |                  |                  |                  |                    |
| <b>All admissions</b>                              |                  |                  |                  |                  |                  |                    |
| <65y                                               | 67.6 (55.7-77.7) | 64.2 (50.5-75.9) | 86.4 (75.8-92.8) | 87.3 (77.4-93.3) | 72.6 (61.3-81.6) | 0.06               |
| 65-74y                                             | 65.4 (54.2-75.1) | 75.0 (61.5-84.9) | 90.9 (79.9-96.2) | 93.3 (84.9-97.2) | 80.0 (67.3-88.6) | 0.0005             |
| ≥75y                                               | 71.9 (65.2-77.7) | 83.2 (77.0-87.9) | 93.7 (88.9-96.5) | 91.0 (85.7-94.4) | 94.2 (90.1-96.7) | <0.0001            |
| <b>Excluding re-admission ≤ 28 days</b>            |                  |                  |                  |                  |                  |                    |
| <65y                                               | 78.0 (65.6-86.8) | 68.0 (53.9-79.4) | 87.5 (76.9-93.6) | 88.6 (78.7-94.2) | 76.8 (65.4-85.3) | 0.32               |
| 65-74y                                             | 87.9 (76.7-94.2) | 79.2 (65.4-88.4) | 90.7 (79.5-96.1) | 93.2 (84.7-97.2) | 88.0 (75.7-94.5) | 0.28               |
| ≥75y                                               | 83.5 (77.2-88.4) | 87.9 (82.1-92.0) | 94.2 (89.5-96.8) | 92.4 (87.3-95.5) | 95.0 (90.9-97.3) | <0.0001            |
| <b>First admission only</b>                        |                  |                  |                  |                  |                  |                    |
| <65y                                               | 83.6 (71.4-91.3) | 73.8 (58.5-84.9) | 86.9 (75.8-93.3) | 88.6 (78.7-94.2) | 78.1 (66.3-86.6) | 0.92               |
| 65-74y                                             | 89.1 (77.7-95.0) | 80.9 (67.0-89.8) | 89.8 (77.7-95.7) | 95.4 (86.6-98.5) | 88.9 (75.9-95.3) | 0.27               |
| ≥75y                                               | 83.0 (76.5-88.0) | 87.3 (81.4-91.6) | 93.7 (88.6-96.6) | 92.4 (87.0-95.6) | 95.0 (90.7-97.4) | <0.0001            |

Numbers are presented as n (%).
